# Supplementary material
Source: Research Square preprint supplement (doi:10.21203/rs.3.rs-9231883/v1)
Supplement: Supplementary file 1 [file 7e7ea2aa53c57c6c0fdab4ed.docx]

**Carbapenem-resistant *Pseudomonas aeruginosa* and *Acinetobacter baumannii* clinical isolates from tertiary carein Nepal**

**Gopiram Syangtan1**,2, Laxmi Kant Khanal 1, 3, Srijana Bista 2, Arun Bahadur Chand 4, Prabin Dawadi 2, Binod Rayamajhee 5, Reshma Tuladhar2, Shiba Kumar Rai 1,3, and Dev Raj Joshi 2

1Shi-Gan International College of Science and Technology (SICOST), Tribhuvan University, Kathmandu, Bagmati, Nepal.

2Central Department of Microbiology, Tribhuvan University, Kathmandu, Bagmati, Nepal

3Department of Microbiology, Nepal Medical College and Teaching Hospital, Kathmandu University, Kathmandu, Bagmati, Nepal

4Department of Microbiology, KIST Medical College and Teaching Hospital, Lalitpur, Bagmati, Nepal

5Department of Infection and Immunology, Kathmandu Research Institute for Biological Sciences (KRIBS), Lalitpur, Bagmati, Nepal

**Supplementary Information**

Figure: 01

Tables: 07

Pages: 06

**
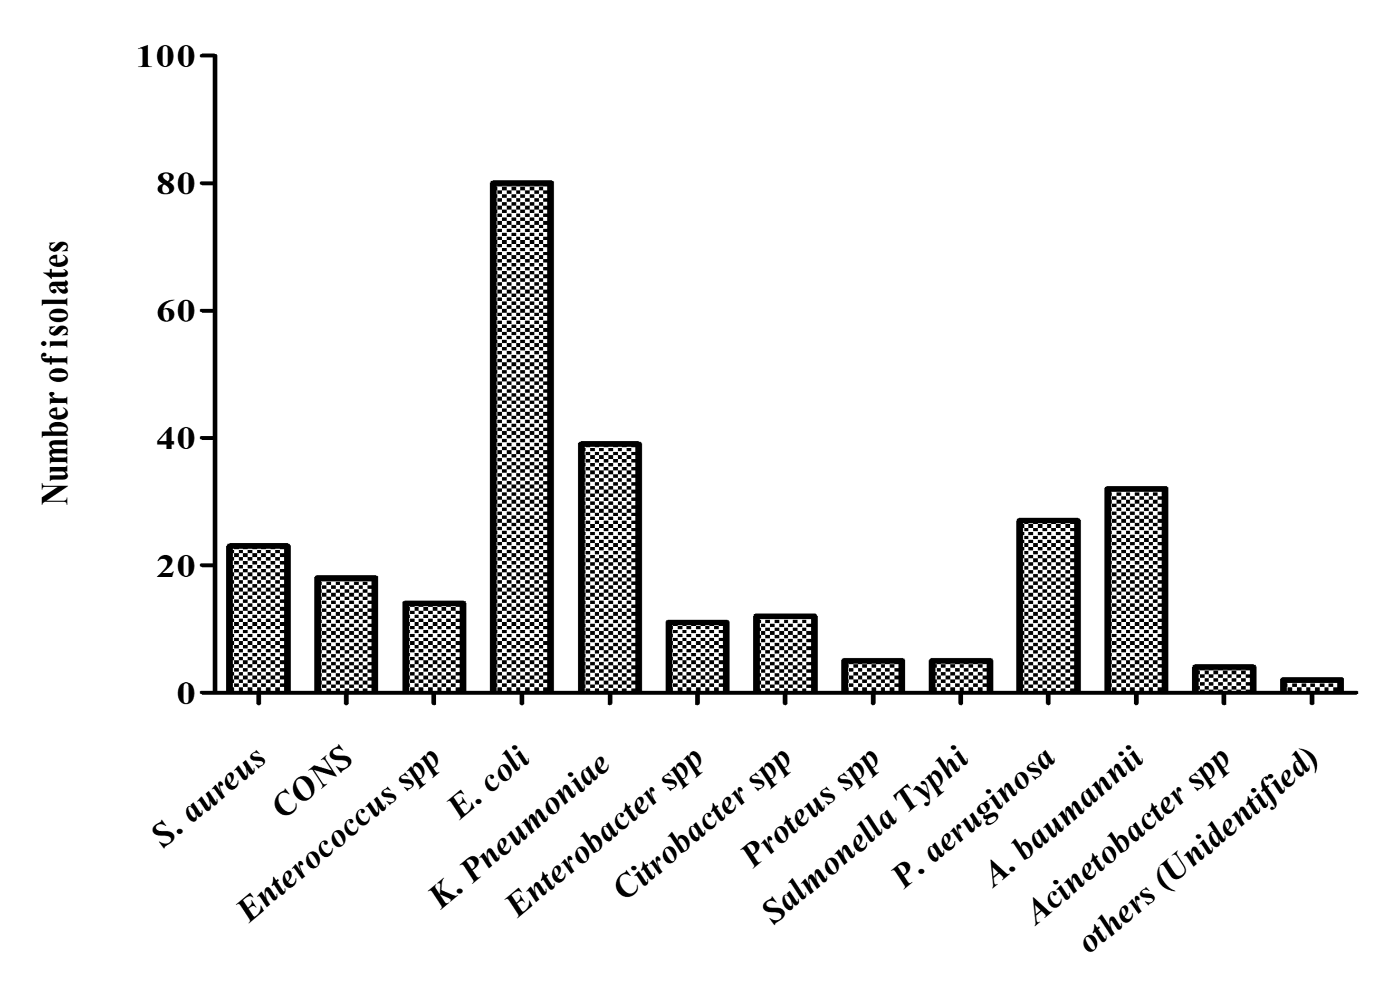
**

**S-Figure 1:** Frequency of total bacterial species isolated from total specimens.

*CONS: Coagulase-negative *Staphylococcus* spp

**S-Table 1**: PCR primers used to detect ESBL and MBL genes in this study.

| **Genes** | **Primer Sequence** | **Amplicon size (bp)** | **Annealing Temperature** | **References** |
| --- | --- | --- | --- | --- |
| **ESBLs** | | | | |
| *bla*CTX-M | F:5-GAGACAATAACCCTGGTAAAT-3 | 544 | 55 ˚C | (24) |
| R:5-AGAAGTAAGTTGGCAGCAGTG-3 |
| *bla*TEM | F:5-TTTGCGATGTGCAGTACCAGTAA-3 | 459 | 56 ˚C | (25) |
| R:5- CGATATCGTTGGTGGTGCCATA-3 |
| **Carbapenemase** | | | | |
| *bla*NDM-1 | F:5-GGTTTGGCGATCTGGTTTTC-3 | 621 | 52 ˚C | (26) |
|  | R:5-CGAATGGCTCATCACGATC-3 |
| *bla*VIM-2 | F-5-ATGTTCAAACTTTTGAGTAAG-3 | 802 | 53 ˚C | (27) |
|  | R:5-CTACTCAACGACTGAGCG-3 |
| *bla*OXA-23 | F:5-GATCGGATTGGAGAACCAGA-3 | 501 | 52 ˚C | (28) |
|  | R:5-ATTCTGACCGCATTTCCAT-3 |  |
| *bla*OXA-51 | F:5-TAATGCTTTGATCGGCCTTG-3 | 353 | 57 ˚C | (28) |
|  | R:5-TGGATTGCACTTCATCTTGG-3 |  |
| *bla*OXA-58 | F:5-AAGTATTGGGGCTTGTGCTG-3 | 599 | 57 ˚C | (28) |
|  | R:5-CCCCTCTGCGCTCTACATAC-3 |  |

**S-Table 2:** Types of specimens processed in this study and number of GN-NLF-isolates and carbapenem-resistant.

| **Specimens** | **Total isolates (n= 59)** | | ***p*-value** | **Carbapenem-resistant isolates (n=37)** | | ***p*-value** |
| --- | --- | --- | --- | --- | --- | --- |
| *P. aeruginosa*  (n=27**/**%) | *A. baumannii*  (n=32**/**%) | *P. aeruginosa*  (n=12**/**%) | *A. baumannii*  *(*n=25**/**%) |
| Sputum | 8 (29.6) | 16 (50.0) | 0.006 | 2 (16.7) | 12 (48.0) | 0.004 |
| Urine | 7 (25.9) | 2 (6.3) | 3 (25.0) | 1 (4.0) |
| Blood | 1 (3.7) | 5 (15.6) | - | 5 (20) |
| Pus/wound swab | 9 (33.3) | 3 (9.4) | 5 (41.7) | 3 (12.0) |
| Tips (ET, Catheter and Foleys) | 2 (7.4) | 6 (18.7) | 2 (16.7) | 4 (16.0) |

**S-Table 3**: Results of antibiotics resistance profile by disk diffusion among non-lactose fermenter Grams negative isolates

| **Test Group** | **Antimicrobial agents** | **Bacterial isolates** | | | | | | ***P*-value** |
| --- | --- | --- | --- | --- | --- | --- | --- | --- |
| ***P. aeruginosa* (%)**  **(n=27)** | | | ***A. baumannii* (%)**  **(n=32)** | | |
|  |  | **S** | **I** | **R** | **S** | **I** | **R** |  |
| Penicillin | Piperacillin | 10 (37.0) | 3  (11.1) | 14 (51.9) | 3  (9.4) | 1  (3.1) | 28  (87.5) | 0.011 |
| β-lactam/ β-lactamase inhibitor combinations | Piperacillin-Tazobactam | 14 (51.9) | 6 (22.2) | 7 (25.9) | 4  (12.5) | 1  (3.1) | 27 (84.4) | 0.001 |
|  | Ceftazidime | 7  (25.9) | 3 (11.1) | 17 (63.0) | 2  (6.3) | - | 30 (93.7) | 0.001 |
| Cephalosporin | Cefepime | 12 (44.4) | - | 15 (55.6) | 3  (9.4) | 2  (6.3) | 27 (84.4) | 0.005 |
|  | Ceftriaxone | IR | | | 1  (3.1) | - | 31 (96.1) | NA |
|  | Cefotaxime | IR | | | 2  (6.3) | 2  (6.3) | 28 (87.5) | NA |
| Aminoglycosides | Gentamycin | 11 (40.7) | - | 16 (59.3) | 4  (12.5) | 2  (6.3) | 26 (81.3) | 0.026 |
|  | Amikacin | 15 (55.6) | 1  (3.7) | 11 (40.7) | 8  (25.0) | 1  (3.1) | 23 (71.9) | 0.05 |
| Fluoroquinolones | Ciprofloxacin | 11 (40.7) | 1  (3.7) | 15 (55.6) | 4  (12.5) | - | 28  (87.5) | 0.020 |
| Monobactam | Aztreonam | 11 (40.7) | 8 (29.6) | 8 (29.6) | IR | | | NA |
| Carbapenem | Meropenem | 15 (55.6) | - | 12 (44.4) | 6  (18.8) | 1  (3.1) | 25 (78.1) | 0.011 |
|  | Imipenem | 15 (55.6) | - | 12 (44.4) | 7 (21.9) | - | 25 (78.1) | 0.008 |
| *IR= Intrinsic Resistant and *NA= Not applicant | | | | | | | | |

**S-Table 4:** Distributions of MDR, CR, ESBL, and MBL among NLF-GNB isolates.

| **Features** | **Bacterial isolates** | | **Total (%)** | ***P*-value** |
| --- | --- | --- | --- | --- |
|  | *P. aeruginosa* (%) **(n=27)** | *A. baumannii* (%) **(n=32)** | (n=59) |  |
| **MDR** | 19 (70.4) | 26 (81.3) | 45 (76.3) | 0.328 |
| **ESBL** | 17 (63.0) | 7 (21.9) | 24 (40.7) | 0.001 |
| **Carbapenem Resistant** | 12 (44.4) | 25 (78.1) | 37 (62.7) | 0.008 |
| **MBL** | 10 (35.7) | 18 (64.3) | 28 (47.5) | 0.141 |

**S-Table 5:** Minimum Inhibitory Concentrations (MIC) of meropenem in CR isolates

| **Organisms** | **MIC value of Carbapenem (Meropenem) among Phenotypic CR**  **(****µg/mL)** | | | | | | ***P*-value** |
| --- | --- | --- | --- | --- | --- | --- | --- |
| **32** | **64** | **128** | **256** | **512** | **Total** |  |
| *P. aeruginosa* | 1 | 1 | 5 | 4 | 1 | 12 | 0.026 |
| *A. baumannii* | 1 | 15 | 7 | 2 | 0 | 25 |
| **Total (n)** | 2 | 16 | 12 | 6 | 1 | 37 |
| **MIC value of Carbapenem (Meropenem) among MBL-positive** | | | | | | | |
| *P. aeruginosa* | 0 | 1 | 4 | 4 | 1 | 10 | 0.073 |
| *A. baumannii* | 1 | 10 | 5 | 2 | 0 | 18 |
| **Total (n)** | 1 | 11 | 9 | 6 | 1 | 28 |

*MIC= Minimum Inhibitory Concentration * CR= Carbapenem Resistance

**S-Table 6:** Carbapenem resistant genes in NFL-GNB isolates from PCR assay.

| **Phenotypes and associated Genes** | **Carbapenem susceptible isolates**  **(n=22)** | | **Carbapenem resistant isolate**  **(n=37)** | | **Total (%)** |
| --- | --- | --- | --- | --- | --- |
| *P. aeruginosa*  (n=15) | *A. baumannii*  (n=7) | *P. aeruginosa*  (n=12) | *A. baumannii*  (n=25) |
| **MBL (Ambler Class B)** | | | | | |
| *bla*NDM-1 | 1 | **-** | 2 (16.7) | 8 (32.0) | 11 (18.6) |
| *bla*VIM-2 | **-** | **-** | 7 (58.3) | 0 | 7 (11.9) |
| **OXAs (Ambler Class D)** | | | | | |
| *bla*OXA-23 | 1 | **-** | 2 (16.7) | 14 (56.0) | 17 (28.8) |
| *bla*OXA-58 | **-** | **-** | 0 | 2 (8.0) | 2 (3.4) |

**S-Table 7.** Co-existence genes conferring resistance to β-lactams carbapenem among the carbapenem resistance isolates.

| Sample Code | MIC value | ESBLs | | | MBL | Carbapenem resistance genes | |
| --- | --- | --- | --- | --- | --- | --- | --- |
|  |  | Phenotype | Genes | | Phenotype | MBL-group | OXA-group |
| ***P. aeruginosa*** | | | | | | | |
| U-1026 | 256 | + | - | - | + | - | - |
| U-1216 | 64 | + | - | - | + | *bla*VIM-2 | - |
| 522 | 128 | - | - | - | + | - | - |
| 44 | 256 | + | *bla*CTX-M | - | + | *bla*NDM-1 and *bla*VIM-2 | - |
| 625 | 256 | + | *bla*CTX-M | - | + | *bla*NDM-1 and *bla*VIM-2 | *bla*OXA-23 |
| 814 | 128 | - | - | - | - | - | *bla*OXA-23 |
| 1435 | 128 | + | *bla*CTX-M | - | + | *bla*VIM-2 |  |
| 1737 | 32 | + | *bla*CTX-M | *bla*TEM | - | - | - |
| C1 | 256 | - | - | - | + | *bla*VIM-2 | - |
| C2 | 128 | + | *bla*CTX-M | - | + | *bla*VIM-2 | - |
| C11 | 128 | - | - | - | + | - | - |
| C12 | 512 | + | *bla*CTX-M | *bla*TEM | + | *bla*VIM-2 | - |
| ***A. baumannii*** | | | | | | | |
| 2226 | 64 | - |  | - | - | - | - |
| 1180 | 128 | - | - | - | + | - | *bla*OXA-23 |
| 1505 | 64 | - | - | - | - | - | - |
| 1274 | 128 | - | - | - | - | - | - |
| 1454 | 64 | - | - | - | - | - | - |
| 1347 | 64 | - | - | - | - | - | - |
| 1160 | 128 | + | *bla*CTX-M | *bla*TEM | + | *bla*NDM-1 | *bla*OXA-23 |
| 1503 | 64 | - | - | - | - | - | - |
| 1142 | 128 | - | - | - | + | *bla*NDM-1 | - |
| 1440 | 64 | - | - | - | + | - | *bla*OXA-23 |
| 592 | 64 | - | - | - | + | *bla*NDM-1 | - |
| 650 | 64 | + | *bla*CTX-M | - | + | - | *bla*OXA-23 and *bla*OXA-58 |
| M694 | 64 | - | - | - | + | - | *bla*OXA-23 |
| A1 | 64 | - | - | - | + | *bla*NDM-1 | *bla*OXA-23 |
| A2 | 64 | - | - | - | + | - | *bla*OXA-23 |
| A4 | 128 | - | - | - | + | *bla*NDM-1 | - |
| P-510 | 256 | - | - | - | + | *bla*NDM-1 | *bla*OXA-23 |
| P-592 | 32 | - | - | - | + | - | *bla*OXA-23 |
| P-417 | 256 | - | - | - | + | *bla*NDM-1 | - |
| P-404 | 128 | + | *bla*CTX-M | *bla*TEM | - | - | *bla*OXA-23 |
| P-451 | 64 | + | *bla*CTX-M | - | - | - | *bla*OXA-23 |
| U-832 | 64 | - | - | - | + | *bla*NDM-1 | *bla*OXA-23 |
| B-550 | 64 | + | *bla*CTX-M | - | + | - | - |
| B-557 | 128 | - | - | - | + | - | *bla*OXA-23 and *bla*OXA-58 |
| 1524 | 64 | - | - | - | + | - | *bla*OXA-23 |
